# Supplementary material for: Clinical and Pathological Diagnosis of Hereditary Gastrointestinal Polyposis in Jack Russell Terriers
Source: MDPI journal article supplement (doi:10.3390/vetsci9100551), 2022-10-08
Supplement: s1 [file s1]

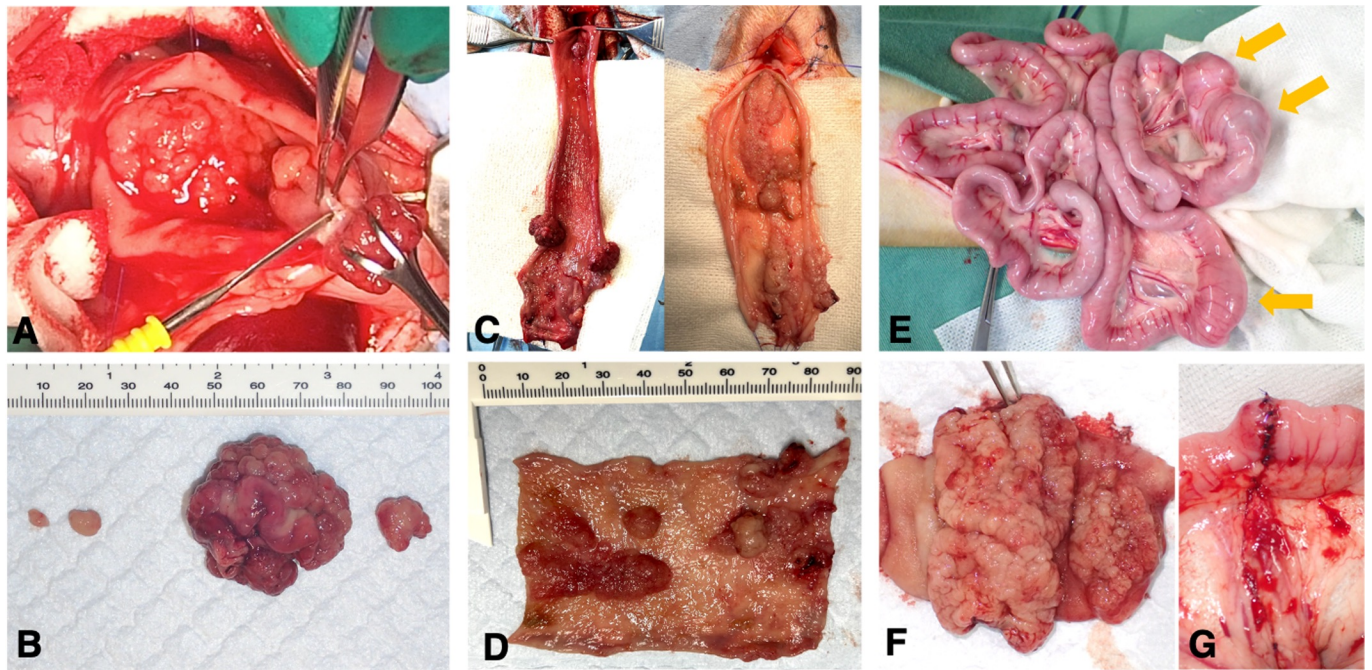

**Figure S1.** Various operative procedures applied to resections of gastrointestinal tumors in Jack Russell Terriers with hereditary gastrointestinal polyposis. (A, B) Submucosal resection of gastric tumors (A) and macroscopic appearance of the resected tumors (B). The mass is being lifted and resected at the submucosal layer with an electrocautery scalpel. (C, D) Colorectal mucosal pull-through procedure. Eight tumors of various sizes on the colorectal mucosa were resected by mucosal pull-through (D). (E-G) Macroscopic appearances of the ileojejunum tumors. Perioperatively, three tumors (yellow arrows) were observed in the small intestine (E). Appearance of the tumors in the longitudinally incised intestinal tract removed by end-to-end anastomosis (F). Photograph of end-to-end anastomosis after mass resection (G).

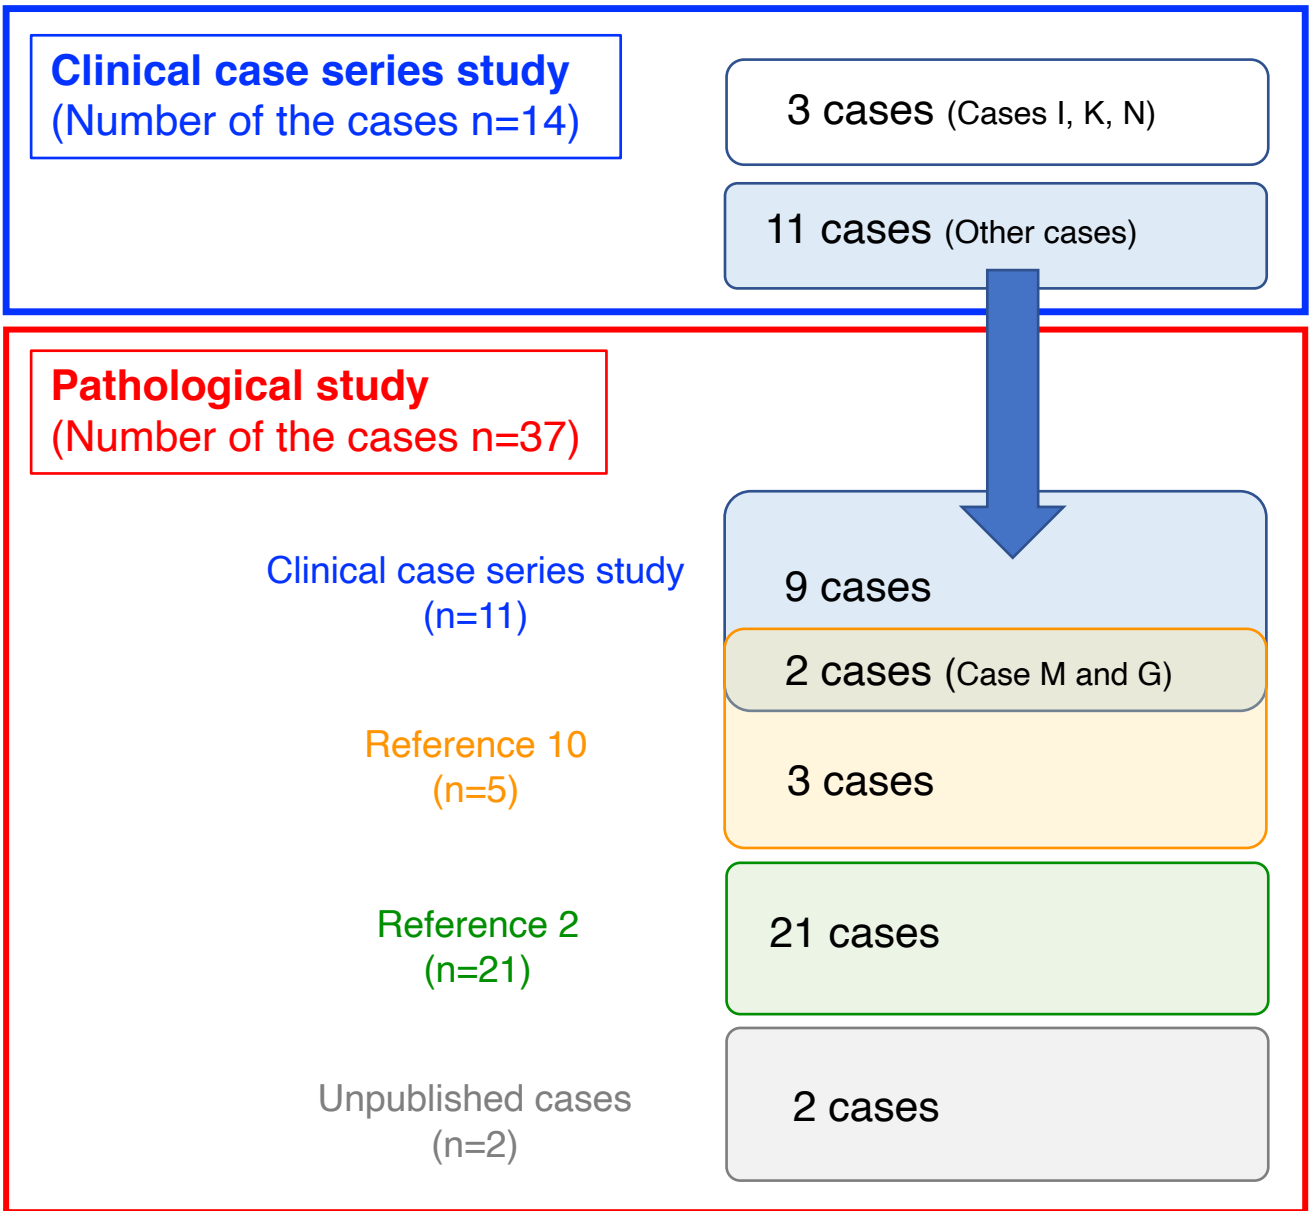

**Figure S2.** Schematic overview of the samples examined in the clinical and pathological studies. See also Supplementary Table 2.

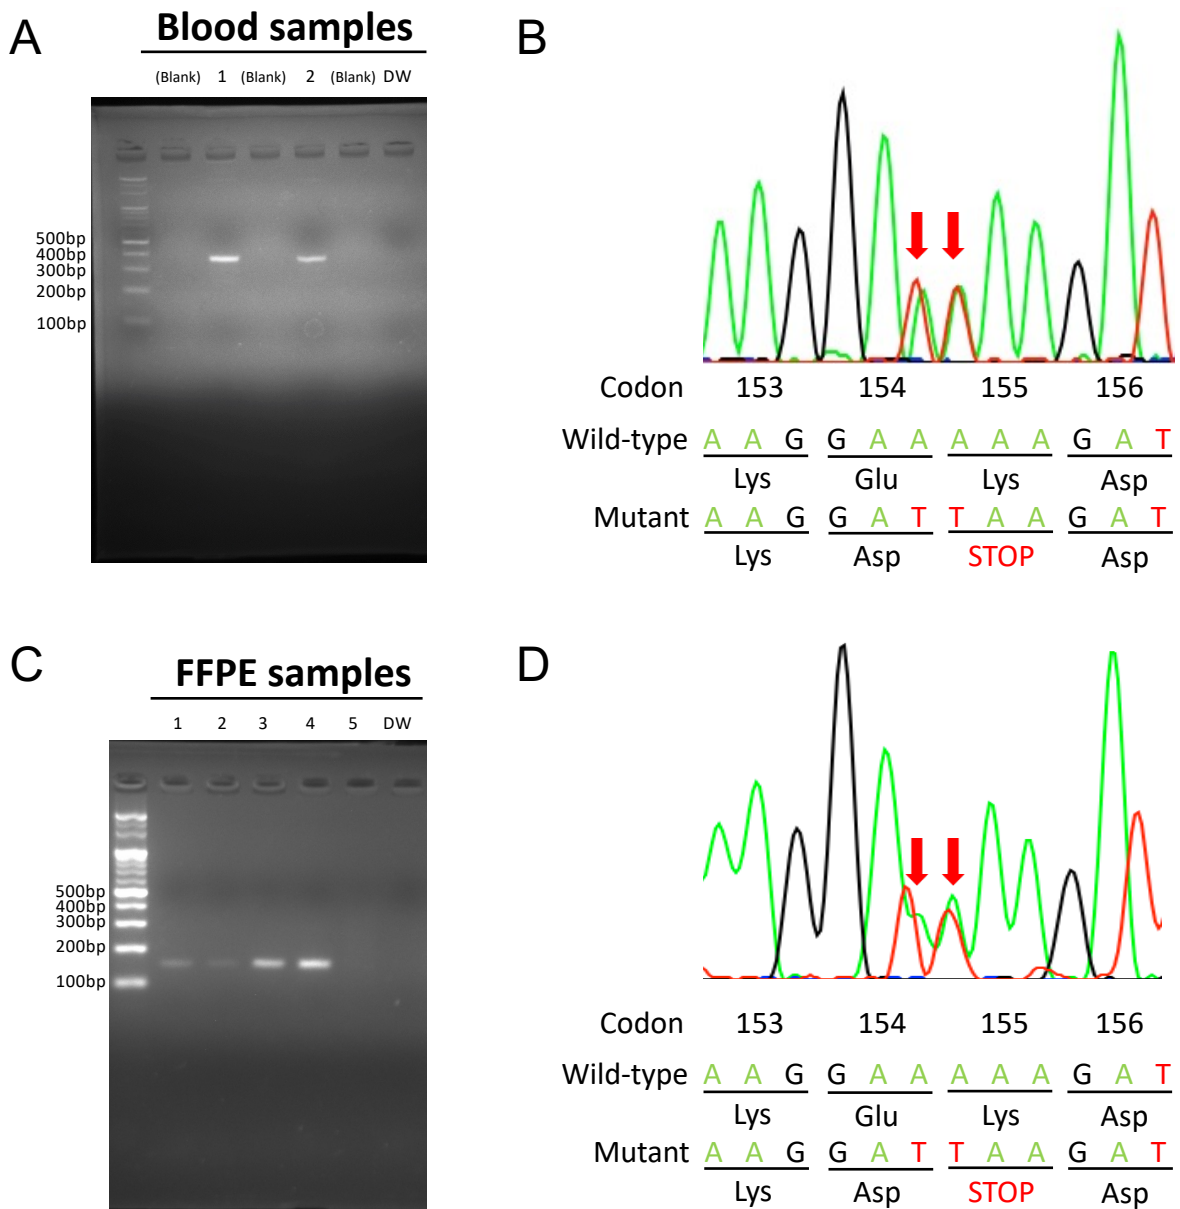

**Figure S3.** Genotyping assays for the hereditary gastrointestinal polyposis-associated germline *APC* variant using PCR-direct sequencing. Representative images of agarose gel electrophoresis of PCR products amplified from blood and formalin-fixed paraffin-embedded (FFPE) samples (A and C) and DNA sequencing electropherograms of codons 153-156 in the *APC* gene (B and D). (A) Cases L and N in the clinical case series study. (B) Case L. (C) Cases JRT20, 4, 10 and 1 in the pathological study (lanes 1, 2, 3 and 4). (D) Case JRT10. Red arrows indicate 2-bp substitution at codon 154-155 (c.[462\_463delinsTT]).

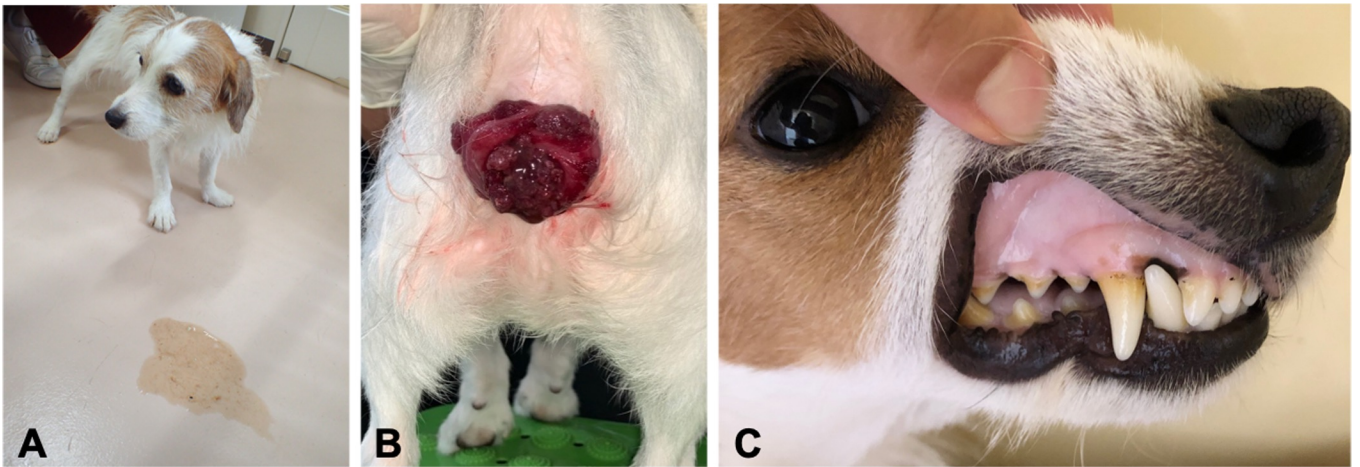

**Figure S4.** Common clinical signs of hereditary gastrointestinal polyposis in Jack Russell Terriers. (A) Vomiting of gastric fluid containing blood. (B) Rectal prolapse with profuse bleeding caused by tenesmus due to a rectal tumor. (C) Mucosal pallor due to anemia.

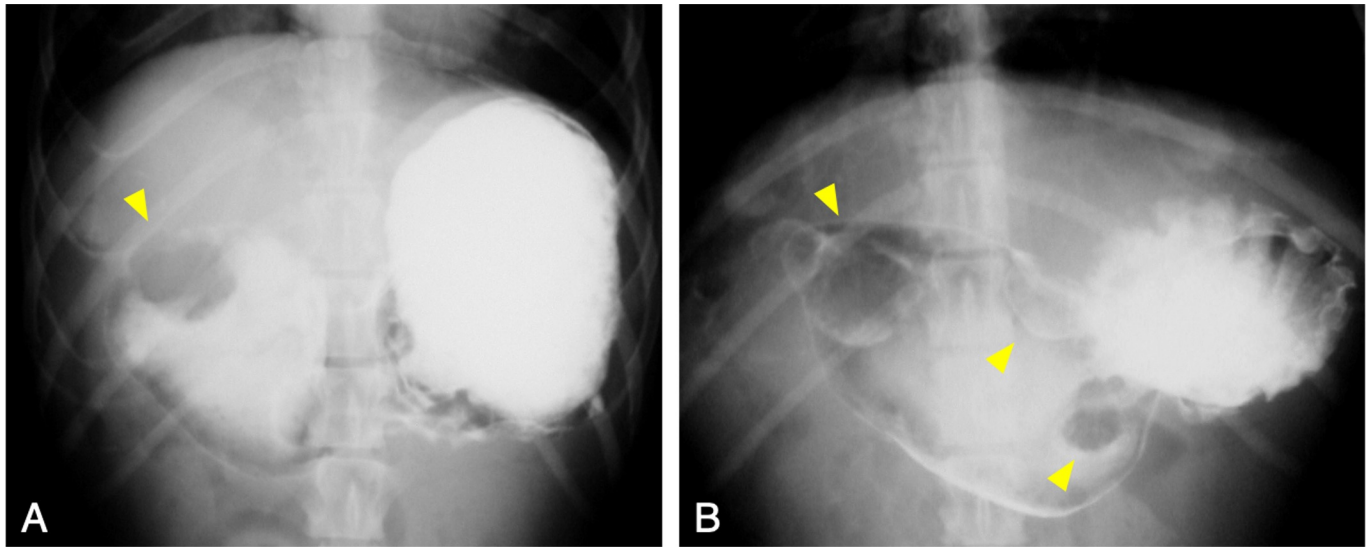

**Figure S5.** Representative X-ray images of gastric tumors in Jack Russell Terriers with hereditary gastrointestinal polyposis. Contrast radiographs taken immediately after barium intake (A) and one hour later (B). (A) Barium contrast radiograph reveals a mass in a pyloric area as a filling defect (yellow arrowhead). (B) On a radiograph taken one hour after barium intake, three polypoid masses (yellow arrowheads) can be visualized in the stomach due to barium adherence.

**Table S1.** Blood test results of Jack Russell Terriers with hereditary gastrointestinal polyposis at initial diagnosis .

| Variable        | RBC                           | Ht                        | WBC                         | Platelets                     | TP                      | ALB                     | GOT                   | GPT                     | T-bil                    | GLU                    | BUN                      | Cre                       | Na                   | K                      | Cl                   |
|-----------------|-------------------------------|---------------------------|-----------------------------|-------------------------------|-------------------------|-------------------------|-----------------------|-------------------------|--------------------------|------------------------|--------------------------|---------------------------|----------------------|------------------------|----------------------|
| Unit            | ( $\times 10^4/\mu\text{l}$ ) | (%)                       | (/ $\mu\text{l}$ )          | ( $\times 10^4/\mu\text{l}$ ) | (g/dl)                  | (g/dl)                  | (U/l)                 | (U/l)                   | (mg/dl)                  | (mg/dl)                | (mg/dl)                  | (mg/dl)                   | (mEq/l)              | (mEq/l)                | (mEq/l)              |
| Reference range | 550-850                       | 37-55                     | 6000-17000                  | 20-50                         | 5.0-7.2                 | 2.6-4.0                 | 17-44                 | 17-78                   | 0-0.5                    | 75-128                 | 9.2-29.2                 | 0.4-1.4                   | 141-152              | 3.8-5.0                | 102-117              |
| <i>Case No.</i> |                               |                           |                             |                               |                         |                         |                       |                         |                          |                        |                          |                           |                      |                        |                      |
| <i>A</i>        | 722                           | 48                        | 8200                        | (-)                           | 5.6                     | 2.4                     | 35                    | 26                      | -                        | 115                    | 15.1                     | 0.70                      | 149                  | 4.2                    | 112                  |
| <i>B</i>        | 563                           | 37                        | 34000                       | 37.2                          | 6.4                     | 2.5                     | 24                    | 18                      | -                        | 141                    | 18.4                     | 0.62                      | 145                  | 3.8                    | 106                  |
| <i>C</i>        | 769                           | 53                        | 14900                       | 40                            | 6.4                     | 3                       | 32                    | 46                      | 0.1                      | 121                    | 15.9                     | 0.75                      | 150                  | 4.1                    | 119                  |
| <i>D</i>        | 475                           | 34                        | 21600                       | 30                            | 5.2                     | 2.9                     | 35                    | 130                     | 0.1                      | 125                    | 28.1                     | 1.12                      | 141                  | 3.1                    | 97                   |
| <i>E</i>        | 256                           | 21                        | 33500                       | 37.2                          | 4.2                     | 1.7                     | 19                    | 17                      | -                        | 117                    | 14.8                     | 0.30                      | 147                  | 4.2                    | 116                  |
| <i>F</i>        | 775                           | 47                        | 17200                       | 30                            | 7.2                     | 2.6                     | 24                    | 61                      | 0.1                      | 102                    | 10.9                     | 1.04                      | (-)                  | (-)                    | (-)                  |
| <i>G</i>        | 680                           | 45                        | 16000                       | 36.1                          | 6.1                     | 3                       | 26                    | 36                      | 0.1                      | 149                    | 18.5                     | 0.70                      | (-)                  | (-)                    | (-)                  |
| <i>H</i>        | 802                           | 54.8                      | 25700                       | 25.1                          | 5.9                     | 2.9                     | 30                    | 28                      | -                        | 104                    | 8.1                      | 0.65                      | 148                  | 4.5                    | 113                  |
| <i>I</i>        | 525                           | 21                        | 41500                       | 68.6                          | ND                      | ND                      | ND                    | ND                      | ND                       | ND                     | ND                       | ND                        | ND                   | ND                     | ND                   |
| <i>J</i>        | 635                           | 33                        | 35300                       | 32                            | 5.7                     | 3                       | -                     | 50                      | -                        | 125                    | 8.9                      | 0.51                      | 150                  | 3.5                    | 111                  |
| <i>K</i>        | ND                            | ND                        | ND                          | ND                            | ND                      | ND                      | ND                    | ND                      | ND                       | ND                     | ND                       | ND                        | ND                   | ND                     | ND                   |
| <i>L</i>        | 689                           | 50                        | 19900                       | 68                            | -                       | 2.3                     | 40                    | 51                      | 0.2                      | 114                    | 13.7                     | 0.87                      | (-)                  | (-)                    | (-)                  |
| <i>M</i>        | 514                           | 37                        | 10400                       | 49.5                          | 7.2                     | 3.6                     | 37                    | 82                      | 0.1                      | 107                    | 21.5                     | 0.60                      | (-)                  | (-)                    | (-)                  |
| <i>N</i>        | 251                           | 18                        | 43900                       | 53.4                          | -                       | 2                       | 143                   | 667                     | 4                        | 111                    | 9.5                      | 0.41                      | (-)                  | (-)                    | (-)                  |
| mean $\pm$ s.d. | 589 $\pm$ 182<br>(n=13)       | 38.4 $\pm$ 12.6<br>(n=13) | 24777 $\pm$ 11781<br>(n=13) | 42.3 $\pm$ 14.5<br>(n=12)     | 6.0 $\pm$ 0.9<br>(n=10) | 2.7 $\pm$ 0.5<br>(n=12) | 40 $\pm$ 35<br>(n=11) | 101 $\pm$ 181<br>(n=12) | 0.67 $\pm$ 1.47<br>(n=7) | 119 $\pm$ 14<br>(n=12) | 15.2 $\pm$ 5.8<br>(n=12) | 0.69 $\pm$ 0.24<br>(n=12) | 147 $\pm$ 3<br>(n=7) | 3.9 $\pm$ 0.5<br>(n=7) | 110 $\pm$ 7<br>(n=7) |

ND, No available data

(-), Not examined



**Table S2.** Histopathological diagnosis of gastrointestinal lesions in Jack Russell Terriers

| Case No. | Tumor No. | Age at first diagnosis | Age at biopsy or surgery | Sex           | Method of excision         | Location of GI epithelial tumor |              | Histopathological diagnosis <sup>1</sup> | Depth of invasion (T status) <sup>2, 3,*</sup> | Reference                        |
|----------|-----------|------------------------|--------------------------|---------------|----------------------------|---------------------------------|--------------|------------------------------------------|------------------------------------------------|----------------------------------|
| JRT-01   | 01        | 10 y 5 m               | 10 y 5 m                 | M             | E                          | Stomach                         | Corpus       | Papillary adenoma                        | -                                              | Ref. 2                           |
| JRT-02   | 01        | 12 y 4 m               | 12 y 4 m                 | M (castrated) | S (resected by hand)       | Large intestine                 | Rectum       | Papillary adenocarcinoma                 | -                                              | Ref. 2                           |
| JRT-03   | 01        | 6 y                    | 6 y                      | M (castrated) | S                          | Large intestine                 | Rectum       | Papillary adenocarcinoma                 | pTis                                           | Ref. 2                           |
| JRT-04   | 01        | 10 y 5 m               | 10 y 5 m                 | M (castrated) | S                          | Large intestine                 | Rectum       | Papillary adenocarcinoma                 | pTis                                           | Ref. 2                           |
| JRT-05   | 01        | 11 y 8 m               | 11 y 8 m                 | F (spayed)    | S                          | Large intestine                 | Rectum       | Papillary adenocarcinoma                 | pTis                                           | Ref. 2                           |
| JRT-06   | 01        | 12 y 1 m               | 12 y 3 m                 | M (castrated) | E (polytectomy)            | Stomach                         | Antrum       | Tubulopapillary adenoma                  | -                                              | Ref. 2                           |
|          | 02        |                        | 12 y 3 m                 | M (castrated) | E (polytectomy)            | Stomach                         | Antrum       | Tubulopapillary adenoma                  | -                                              |                                  |
| JRT-07   | 01        | 5 y 3 m                | 5 y 3 m                  | M             | S                          | Large intestine                 | Rectum       | Papillary adenocarcinoma                 | pTis                                           | Ref. 2                           |
|          | 02        |                        | 5 y 3 m                  |               | S                          | Large intestine                 | Rectum       | Papillary adenocarcinoma                 | pTis                                           |                                  |
|          | 03        |                        | 7 y 3 m                  |               | S                          | Large intestine                 | Rectum       | Papillary adenocarcinoma                 | pTis                                           |                                  |
| JRT-08   | 01        | 7 y 10 m               | 7 y 10 m                 | M             | E                          | Stomach                         | Cardia       | Tubular adenoma                          | -                                              | Ref. 2                           |
|          | 02        |                        | 7 y 10 m                 |               | E                          | Stomach                         | Antrum       | Tubular adenoma                          | -                                              |                                  |
|          | 03        |                        | 7 y 10 m                 |               | E                          | Large intestine                 | Colon        | Papillary adenocarcinoma                 | -                                              |                                  |
| JRT-09   | 01        | 9 y 9 m                | 13 y 2 m                 | M (castrated) | S (pull-through)           | Large intestine                 | Rectum       | Papillary adenocarcinoma                 | pTis                                           | Ref. 2                           |
| JRT-10   | 01        | 7 y 3 m                | 8 y 11 m                 | M (castrated) | S                          | Large intestine                 | Rectum       | Papillary adenocarcinoma                 | pTis                                           | Ref. 2                           |
|          | 02        |                        | 8 y 11 m                 |               | S                          | Large intestine                 | Rectum       | Papillary adenocarcinoma                 | pTis                                           |                                  |
|          | 03        |                        | 8 y 11 m                 |               | S                          | Large intestine                 | Rectum       | Papillary adenocarcinoma                 | pTis                                           |                                  |
|          | 04        |                        | 8 y 11 m                 |               | S                          | Large intestine                 | Rectum       | Papillary adenocarcinoma                 | pTis                                           |                                  |
|          | 05        |                        | 8 y 11 m                 |               | S                          | Large intestine                 | Rectum       | Adenoma                                  | -                                              |                                  |
| JRT-11   | 01        |                        | 12 y 5 m                 | M (castrated) | S (resected by laser)      | Large intestine                 | Rectum       | Papillary adenocarcinoma                 | pTis                                           | Ref. 2                           |
| JRT-12   | 01        | 4 y 1 m                | 7 y 8 m                  | F (spayed)    | S (resected by hand)       | Large intestine                 | Rectum       | Papillary adenocarcinoma                 | unevaluable                                    | Ref. 2                           |
|          | 02        |                        | 7 y 9 m                  |               | S                          | Stomach                         | Antrum       | Papillary adenocarcinoma                 | pTis                                           |                                  |
|          | 03        |                        | 9 y 2 m                  |               | E                          | Stomach                         | Antrum       | Tubulopapillary adenoma                  | -                                              |                                  |
|          | 04        |                        | 9 y 8 m                  |               | E (polytectomy)            | Stomach                         | Antrum       | Tubulopapillary adenoma                  | -                                              |                                  |
|          | 05        |                        | 13 y 3 m                 |               | S (pull-through)           | Large intestine                 | Rectum       | Papillary adenocarcinoma                 | pTis                                           |                                  |
| JRT-13   | 01        | 8 y 0 m                | 8 y 0 m                  | M             | E                          | Stomach                         | Corpus       | Papillary adenocarcinoma                 | -                                              | Ref. 2                           |
| JRT-14   | 01        | 5 y 2 m                | 8 y 9 m                  | F             | E                          | Stomach                         | Cardia       | Tubulopapillary adenoma                  | -                                              | Ref. 2                           |
|          | 02        |                        | 8 y 9 m                  |               | E                          | Large intestine                 | Rectum       | Papillary adenocarcinoma                 | -                                              |                                  |
| JRT-15   | 01        | 11 y 4 m               | 11 y 4 m                 | F (spayed)    | S (partial resection)      | Stomach                         | Antrum       | Tubular adenocarcinoma                   | (pT2) <sup>4</sup>                             | Clinical study (Case M), Ref. 10 |
| JRT-16   | 01        | 6 y 2 m                | 9 y 1 m                  | F             | S (Billroth I)             | Stomach                         | Antrum       | Tublopapillary adenocarcinoma            | pTis                                           | Ref. 2                           |
| JRT-17   | 01        | 6 y 6 m                | 8 y 6 m                  | F (spayed)    | S (Billroth I)             | Stomach                         | Antrum       | Tubular adenocarcinoma                   | pT1 a                                          | Ref. 2                           |
|          | 02        |                        | 8 y 6 m                  |               | S (Billroth I)             | Stomach                         | Corpus       | Tubulopapillary adenoma                  | -                                              |                                  |
| JRT-18   | 01        | 10 y 3 m               | 10 y 3 m                 | F (spayed)    | E                          | Stomach                         | Antrum       | Hyperplastic polyp                       | -                                              | Ref. 2                           |
|          | 02        |                        | 10 y 3 m                 |               | E                          | Stomach                         | Antrum       | Hyperplastic polyp                       | -                                              |                                  |
|          | 03        |                        | 10 y 3 m                 |               | E                          | Stomach                         | Antrum       | Tubulopapillary adenoma                  | -                                              |                                  |
|          | 04        |                        | 10 y 3 m                 |               | E                          | Large intestine                 | Rectum       | Papillary adenocarcinoma                 | -                                              |                                  |
| JRT-19   | 01        | 9 y 7 m                | 9 y 7 m                  | F (spayed)    | S                          | Stomach                         | Antrum       | Tublopapillary adenocarcinoma            | pTis                                           | -                                |
| JRT-20   | 01        | 7 y 8 m                | 7 y 8 m                  | F (spayed)    | S                          | Stomach                         | Antrum       | Tublopapillary adenoma                   | pTis                                           | Ref. 2                           |
|          | 02        |                        | 13 y 10 m                |               | S                          | Stomach                         | Cardia       | Tubular adenocarcinoma                   | pT1 a                                          |                                  |
|          | 03        |                        | 13 y 10 m                |               | S                          | Stomach                         | Antrum       | Tublopapillary adenoma                   | pTis                                           |                                  |
| JRT-21   | 01        | 7 y 6 m                | 7 y 6 m                  | M (castrated) | E                          | Large intestine                 | Rectum       | Papillary adenocarcinoma                 | -                                              | -                                |
| JRT-22   | 01        | 2 y 3 m                | 2 y 4 m                  | M             | S                          | Stomach                         | Antrum       | Tublopapillary adenoma                   | -                                              | Ref. 2                           |
|          | 02        |                        |                          |               | S                          | Stomach                         | Antrum       | Tublopapillary adenoma                   | -                                              |                                  |
|          | 03        |                        |                          |               | S                          | Stomach                         | Antrum       | Papillary adenoma                        | -                                              |                                  |
|          | 04        |                        |                          |               | S                          | Stomach                         | Antrum       | Tublopapillary adenoma                   | -                                              |                                  |
| JRT-23   | 01        | 7 y 4 m                | 7 y 4 m                  | F             | E                          | Stomach                         | Antrum       | Tubulopapillary adenocarcinoma           | -                                              | Ref. 10                          |
|          | 02        |                        | 7 y 4 m                  |               | E                          | Stomach                         | Antrum       | Tubulopapillary adenocarcinoma           | -                                              |                                  |
| JRT-24   | 01        | 6 y 1 m                | 6 y 1 m                  | M (castrated) | E                          | Large intestine                 | Rectum       | Papillary adenocarcinoma                 | -                                              | Ref. 10                          |
| JRT-25   | 01        | 8 y 2 m                | 8 y 2 m                  | F (spayed)    | S (local excision)         | Stomach                         | Cardia       | Tubular adenocarcinoma                   | pTis                                           | Clinical study (Case L)          |
|          | 02        |                        | 8 y 2 m                  |               | S (local excision)         | Stomach                         | Cardia       | Tubular adenocarcinoma                   | pTis                                           |                                  |
|          | 03        |                        | 8 y 2 m                  |               | S (local excision)         | Stomach                         | Antrum       | Tubulopapillary adenocarcinoma           | pTis                                           |                                  |
| JRT-26   | 01        | 6 y 6 m                | 6 y 6 m                  | M (castrated) | E                          | Stomach                         | Antrum       | Tubulopapillary adenocarcinoma           | -                                              | Clinical study (Case G), Ref. 10 |
|          | 02        |                        | 6 y 8 m                  |               | S (pull-through)           | Large intestine                 | Rectum       | Papillary adenocarcinoma                 | pTis                                           |                                  |
|          | 03        |                        | 6 y 8 m                  |               | S (pull-through)           | Large intestine                 | Rectum       | Papillary adenocarcinoma                 | pTis                                           |                                  |
|          | 04        |                        | 6 y 8 m                  |               | S (pull-through)           | Large intestine                 | Rectum       | Papillary adenocarcinoma                 | pTis                                           |                                  |
|          | 05        |                        | 6 y 8 m                  |               | S (pull-through)           | Large intestine                 | Rectum       | Papillary adenocarcinoma                 | pTis                                           |                                  |
|          | 06        |                        | 6 y 8 m                  |               | S (pull-through)           | Large intestine                 | Rectum       | Papillary adenocarcinoma                 | pTis                                           |                                  |
| JRT-27   | 01        |                        | 6 y 9 m                  |               | E                          | Small intestine                 | Duodenum     | Papillary adenocarcinoma                 | -                                              | Clinical study (Case H)          |
|          | 02        |                        | 6 y 9 m                  |               | E                          | Large intestine                 | Colon        | Papillary adenocarcinoma                 | -                                              |                                  |
| JRT-28   | 01        | 4 y 7 m                | 5 y 4 m                  |               | E                          | Stomach                         | Not specifed | Tubulopapillary adenoma                  | -                                              | Clinical study (Case E)          |
|          | 02        |                        | 5 y 4 m                  |               | E                          | Large intestine                 | Colon        | Papillary adenocarcinoma                 | -                                              |                                  |
|          | 03        |                        | 5 y 4 m                  |               | S (pull-through)           | Large intestine                 | Rectum       | Papillary adenocarcinoma                 | pTis                                           |                                  |
| JRT-29   | 01        | 5y                     | 5y                       | M (castrated) | E (polytectomy)            | Stomach                         | Antrum       | Tubulopapillary adenocarcinoma           | -                                              | Ref. 2                           |
|          | 02        |                        | 5y                       |               | S (resected by hand)       | Large intestine                 | Rectum       | Papillary adenocarcinoma                 | -                                              |                                  |
| JRT-30   | 01        | 3y                     | 3y                       | F             | S                          | Stomach                         | Antrum       | Tubulopapillary adenocarcinoma           | pTis                                           | Ref. 2                           |
| JRT-31   | 01        | 6 y 2 m                | 6 y 2 m                  | F (spayed)    | E                          | Stomach                         | Antrum       | Tubulopapillary adenocarcinoma           | -                                              | Ref. 10                          |
| JRT-32   | 01        | 4 y 10 m               | 4 y 10 m                 | F (spayed)    | E                          | Large intestine                 | Colon        | Papillary adenocarcinoma                 | -                                              | Clinical study (Case F)          |
|          | 02        |                        | 4 y 11 m                 |               | E                          | Stomach                         | Not specifed | Tubulopapillary adenoma                  | -                                              |                                  |
|          | 03        |                        | 5 y 0 m                  |               | S                          | Large intestine                 | Rectum       | Papillary adenocarcinoma                 | pTis                                           |                                  |
|          | 04        |                        | 6 y 0 m                  |               | S (end to end anastomosis) | Small intestine                 | Jejunum      | Papillary adenocarcinoma                 | pTis                                           |                                  |
|          | 05        |                        | 6 y 0 m                  |               | S (end to end anastomosis) | Small intestine                 | Jejunum      | Papillary adenocarcinoma                 | pTis                                           |                                  |
|          | 06        |                        | 6 y 0 m                  |               | S (local excision)         | Stomach                         | Antrum       | Tubulopapillary adenocarcinoma           | pTis                                           |                                  |
|          | 07        |                        | 6 y 0 m                  |               | S (local excision)         | Stomach                         | Antrum       | Tubulopapillary adenocarcinoma           | pTis                                           |                                  |
|          | 08        |                        | 6 y 1 m                  |               | S (pull-through)           | Large intestine                 | Rectum       | Papillary adenocarcinoma                 | pTis                                           |                                  |
|          | 09        |                        | 6 y 1 m                  |               | S (pull-through)           | Large intestine                 | Rectum       | Papillary adenocarcinoma                 | pTis                                           |                                  |
|          | 10        |                        | 6 y 1 m                  |               | S (pull-through)           | Large intestine                 | Rectum       | Papillary adenocarcinoma                 | pTis                                           |                                  |
|          | 11        |                        | 6 y 1 m                  |               | S (pull-through)           | Large intestine                 | Rectum       | Papillary adenocarcinoma                 | pTis                                           |                                  |
|          | 12        |                        | 6 y 1 m                  |               | S (pull-through)           | Large intestine                 | Rectum       | Papillary adenocarcinoma                 | pTis                                           |                                  |
|          | 13        |                        | 6 y 1 m                  |               | S (pull-through)           | Large intestine                 | Rectum       | Papillary adenocarcinoma                 | pTis                                           |                                  |
|          | 14        |                        | 6 y 1 m                  |               | S (pull-through)           | Large intestine                 | Rectum       | Papillary adenocarcinoma                 | pTis                                           |                                  |
|          | 15        |                        | 6 y 1 m                  |               | S (pull-through)           | Large intestine                 | Rectum       | Papillary adenocarcinoma                 | pTis                                           |                                  |
|          | 16        |                        | 6 y 1 m                  |               | S (pull-through)           | Large intestine                 | Rectum       | Papillary adenocarcinoma                 | pTis                                           |                                  |
|          | 17        |                        | 6 y 1 m                  |               | S (pull-through)           | Large intestine                 | Rectum       | Papillary adenocarcinoma                 | unevaluable                                    |                                  |

|        |    |          |          |               |                    |                 |               |                                |             |                         |
|--------|----|----------|----------|---------------|--------------------|-----------------|---------------|--------------------------------|-------------|-------------------------|
|        |    | 18       | 6 y 1 m  |               | S (pull-through)   | Large intestine | Rectum        | Papillary adenocarcinoma       | unevaluable |                         |
|        |    | 19       | 6 y 1 m  |               | S (pull-through)   | Large intestine | Rectum        | Papillary adenocarcinoma       | unevaluable |                         |
|        |    | 20       | 6 y 1 m  |               | S (pull-through)   | Large intestine | Rectum        | Papillary adenocarcinoma       | unevaluable |                         |
|        |    | 21       | 6 y 9 m  |               | S (local excision) | Stomach         | Antrum        | Tubulopapillary adenocarcinoma | pTis        |                         |
|        |    | 22       | 6 y 9 m  |               | S (local excision) | Stomach         | Antrum        | Tubulopapillary adenocarcinoma | pTis        |                         |
|        |    | 23       | 6 y 9 m  |               | S (local excision) | Stomach         | Antrum        | Tubulopapillary adenocarcinoma | pTis        |                         |
|        |    | 24       | 6 y 9 m  |               | S (local excision) | Stomach         | Antrum        | Tubulopapillary adenocarcinoma | pTis        |                         |
|        |    | 25       | 6 y 9 m  |               | S (local excision) | Stomach         | Antrum        | Tubulopapillary adenocarcinoma | pTis        |                         |
|        |    | 26       | 6 y 9 m  |               | S (local excision) | Stomach         | Antrum        | Tubulopapillary adenocarcinoma | unevaluable |                         |
|        |    | 27       | 6 y 9 m  |               | S (local excision) | Stomach         | Antrum        | Tubulopapillary adenoma        | -           |                         |
| JRT-33 | 01 | 7 y 4 m  | 7 y 5 m  | F             | S (pull-through)   | Large intestine | Rectum        | Papillary adenocarcinoma       | pTis        | Clinical study (Case J) |
|        | 02 |          | 7 y 5 m  |               | S (pull-through)   | Large intestine | Rectum        | Papillary adenocarcinoma       | pTis        |                         |
|        | 03 |          | 7 y 5 m  |               | S (pull-through)   | Large intestine | Rectum        | Papillary adenocarcinoma       | pTis        |                         |
|        | 04 |          | 7 y 5 m  |               | S (pull-through)   | Large intestine | Rectum        | Papillary adenocarcinoma       | pTis        |                         |
|        | 05 |          | 7 y 5 m  |               | S (pull-through)   | Large intestine | Rectum        | Papillary adenocarcinoma       | pTis        |                         |
|        | 06 |          | 7 y 5 m  |               | S (pull-through)   | Large intestine | Rectum        | Papillary adenocarcinoma       | pTis        |                         |
|        | 07 |          | 7 y 5 m  |               | S (pull-through)   | Large intestine | Rectum        | Papillary adenocarcinoma       | pTis        |                         |
| JRT-34 | 08 | 3 y 4 m  | 7 y 5 m  |               | S (pull-through)   | Large intestine | Rectum        | Papillary adenocarcinoma       | pTis        |                         |
|        | 01 |          | 3 y 6 m  | F             | E                  | Small intestine | Duodenum      | Papillary adenocarcinoma       | -           | Clinical study (Case A) |
|        | 02 |          | 4 y 7 m  |               | S                  | Small intestine | Jejunum/Ileum | Papillary adenocarcinoma       | pT2         |                         |
|        | 03 |          | 4 y 7 m  |               | S                  | Small intestine | Jejunum/Ileum | Papillary adenocarcinoma       | pT1a        |                         |
|        | 04 |          | 4 y 7 m  |               | S                  | Small intestine | Jejunum/Ileum | Papillary adenocarcinoma       | pT1a        |                         |
| JRT-35 | 05 | 3 y 3 m  | 5 y 2 m  |               | E                  | Stomach         | Antrum        | Tubulopapillary adenocarcinoma | -           |                         |
|        | 01 |          | 3 y 3 m  | M (castrated) | E                  | Stomach         | Not specifed  | Hyperplastic polyp             | -           | Clinical study (Case B) |
|        | 02 |          | 3 y 3 m  |               | E                  | Small intestine | Duodenum      | Papillary adenocarcinoma       | -           |                         |
|        | 03 |          | 3 y 3 m  |               | E                  | Large intestine | Colon         | Papillary adenocarcinoma       | -           |                         |
|        | 04 |          | 3 y 3 m  |               | E                  | Large intestine | Rectum        | Papillary adenocarcinoma       | -           |                         |
|        | 05 |          | 4 y 2 m  |               | S (pull-through)   | Large intestine | Colon         | Papillary adenocarcinoma       | pTis        |                         |
|        | 06 |          | 4 y 2 m  |               | S (pull-through)   | Large intestine | Colon         | Papillary adenocarcinoma       | pTis        |                         |
|        | 07 |          | 4 y 2 m  |               | S (pull-through)   | Large intestine | Colon         | Papillary adenocarcinoma       | pTis        |                         |
|        | 08 |          | 4 y 2 m  |               | S (pull-through)   | Large intestine | Colon         | Papillary adenocarcinoma       | pTis        |                         |
|        | 09 |          | 4 y 2 m  |               | S (pull-through)   | Large intestine | Colon         | Papillary adenocarcinoma       | pTis        |                         |
|        | 10 |          | 4 y 2 m  |               | S (pull-through)   | Large intestine | Rectum        | Acinar adenocarcinoma          | pTis        |                         |
|        | 11 |          | 4 y 2 m  |               | S (pull-through)   | Large intestine | Rectum        | Papillary adenocarcinoma       | pTis        |                         |
|        | 12 |          | 4 y 2 m  |               | S (pull-through)   | Large intestine | Rectum        | Papillary adenocarcinoma       | pTis        |                         |
|        | 13 |          | 4 y 2 m  |               | S (pull-through)   | Large intestine | Rectum        | Papillary adenocarcinoma       | pTis        |                         |
| JRT-36 | 14 | 3 y 11 m | 4 y 2 m  |               | S (pull-through)   | Large intestine | Rectum        | Papillary adenocarcinoma       | pTis        |                         |
|        | 01 |          | 3 y 11 m | F             | S (pull-through)   | Large intestine | Rectum        | Papillary adenocarcinoma       | pT1         | Clinical study (Case C) |
|        | 02 |          | 3 y 11 m |               | S (pull-through)   | Large intestine | Rectum        | Papillary adenocarcinoma       | pTis        |                         |
|        | 03 |          | 3 y 11 m |               | S (pull-through)   | Large intestine | Rectum        | Papillary adenocarcinoma       | pTis        |                         |
| JRT-37 | 04 | 4 y 3 m  | 3 y 11 m |               | S (pull-through)   | Large intestine | Rectum        | Papillary adenocarcinoma       | pTis        |                         |
|        | 01 |          | 4 y 3 m  | F             | S (local excision) | Stomach         | Corpus        | Tubulopapillary adenocarcinoma | pTis        | Clinical study (Case D) |
|        | 02 |          | 4 y 3 m  |               | S (local excision) | Stomach         | Corpus        | Tubulopapillary adenocarcinoma | pTis        |                         |
|        | 03 |          | 4 y 3 m  |               | S (local excision) | Stomach         | Corpus        | Tubulopapillary adenocarcinoma | unevaluable |                         |
|        | 04 |          | 4 y 3 m  |               | S (local excision) | Stomach         | Corpus        | Tubulopapillary adenocarcinoma | unevaluable |                         |
|        | 05 |          | 4 y 3 m  |               | S (local excision) | Stomach         | Antrum        | Tubulopapillary adenocarcinoma | pTis        |                         |
|        | 06 |          | 4 y 3 m  |               | S (local excision) | Stomach         | Antrum        | Tubulopapillary adenocarcinoma | pTis        |                         |

y: years, m: months, M: Male, F: Female, E: Endoscopic biopsy, S: Surgical resection

<sup>1</sup> Histological Classification of Tumours of the Alimentary System of Domestic Animals (WHO International Classification of Tumors of Domestic Animal Series) (Ref. 2)

<sup>2</sup> TNM classification of malignant tumors (Ref. 13)

<sup>3</sup> AJCC cancer staging manual (Ref. 12)

<sup>4</sup> It was not possible to examine the tissues deeper than muscularis propria due to partial resection.

\*T (tumor) status, the depth of invasion, are evaluated according to the following criteria.

Stomach:

Tis: Intraepithelial tumor without invasion of the lamina propria (carcinoma in situ), T1a: Tumor invades lamina propria or muscularis mucosae, T1b: Tumor invades submucosa, T2 Tumor invades muscularis propria, T3: Tumor invades subserosa, T4a: Tumor perforates serosa (visceral peritoneum), T4b: Tumor invades adjacent structures.

Small intestine:

Tis: Carcinoma in situ, T1a: Tumor invades lamina propria or muscularis mucosae, T1b: Tumor invades submucosa, T2: Tumor invades muscularis propria, T3: Tumor invades subserosa or nonperitonealized perimuscular tissue (mesentery or retroperitoneum) with extension 2 cm or less, T4: Tumor perforates visceral peritoneum or directly invades other organs or structure (includes other loops of small intestine, mesentery, or retroperitoneum more than 2 cm and abdominal wall by way of serosa; for duodenum only. invasion of pancreas)

Large intestine:

Tis: Intraepithelial or invasion of lamina propria (carcinoma in situ), T1: Tumor invades submucosa, T2: Tumor invades muscularis propria, T3: Tumor invades subserosa or into non-peritonealized pericolic or perirectal tissue, T4a: Tumor perforates visceral peritoneum, T4b: Tumor directly invades other organs or structure.



**Table S3.** Case information and histopathological findings of sporadic gastrointestinal adenocarcinomas of multiple dog breeds other than JRTs

| Case No. | Age at diagnosis | Sex              | Dog breed                  | Location of tumor                  | Histopathological diagnosis <sup>1</sup> | Depth of invasion (T status) <sup>2, 3,*</sup> |
|----------|------------------|------------------|----------------------------|------------------------------------|------------------------------------------|------------------------------------------------|
| SC-01    | 10 y 6 m         | Male             | Toy Poodle                 | Stomach                            | Tubulopapillary adenocarcinoma           | pTis                                           |
| SC-02    | 9 y              | Female           | Border Collie              | Stomach                            | Signet-ring cell carcinoma               | pT3                                            |
| SC-03    | 6 y 3 m          | Female (spayed)  | Toy Poodle                 | Stomach                            | Tubulopapillary adenocarcinoma           | pTis                                           |
| SC-04    | 12 y 7 m         | Female (spayed)  | Mixed-breed                | Stomach                            | Signet-ring cell carcinoma               | pT3                                            |
| SC-05    | N.D.             | Male (castrated) | French Bulldog             | Stomach                            | Tubulopapillary adenocarcinoma           | pTis                                           |
| SC-06    | 7 y 11 m         | Male (castrated) | Miniature Dachshund        | Stomach                            | Signet-ring cell carcinoma               | pT4a                                           |
| SC-07    | 7 y 8 m          | Female           | Toy Poodle                 | Stomach                            | Tubulopapillary adenocarcinoma           | pTis                                           |
| SC-08    | 9 y 2 m          | Female (spayed)  | Mixed-breed (Japanese dog) | Small intestine                    | Signet-ring cell carcinoma               | pT3                                            |
| SC-09    | 12 y 3 m         | Male             | Miniature Dachshund        | Small intestine (Ileum)            | Papillary adenocarcinoma                 | pT3                                            |
| SC-10    | 14 y             | Male             | Miniature Dachshund        | Small intestine                    | Acinar adenocarcinoma                    | pT2                                            |
| SC-11    | 7 y 10 m         | Female           | Miniature Pinscher         | Small intestine (Jejunum-Ileum)    | Acinar adenocarcinoma                    | pT2                                            |
| SC-12    | 13 y             | Female (spayed)  | Toy Poodle                 | Small intestine                    | Acinar adenocarcinoma                    | pT3                                            |
| SC-13    | 13 y 9 m         | Male             | Miniature Dachshund        | Small intestine (Ileum)            | Papillary adenocarcinoma                 | pTis                                           |
| SC-14    | 13 y             | Female           | Toy Poodle                 | Small intestine                    | Mucinous adenocarcinoma                  | pT3                                            |
| SC-15    | 14 y             | Female (spayed)  | Shih Tzu                   | Small intestine                    | Acinar adenocarcinoma                    | pT3                                            |
| SC-16    | 12 y 5 m         | Female (spayed)  | Miniature Schnauzer        | Small intestine (Duodenum-Jejunum) | Mucinous adenocarcinoma                  | pT3                                            |
| SC-17    | 7 y              | Male (castrated) | Shiba Inu                  | Small intestine                    | Acinar adenocarcinoma                    | pT3                                            |
| SC-18-1  | 11 y 3 m         | Female (spayed)  | American Cocker Spaniel    | Small intestine (Ileum)            | Papillary adenocarcinoma                 | pT2                                            |
| SC-18-2  |                  |                  |                            | Small intestine (Ileum)            | Papillary adenocarcinoma                 | pT2                                            |
| SC-19    | 13 y 1 m         | Male             | Miniature Dachshund        | Small intestine (Ileum)            | Papillary adenocarcinoma                 | pT2                                            |
| SC-20    | 9 y 6 m          | Female           | Chihuahua                  | Small intestine (Ileum)            | Papillary adenocarcinoma                 | pT2                                            |
| SC-21    | 8 y 6 m          | Female (spayed)  | Miniature Dachshund        | Large intestine (Rectum)           | Acinar adenocarcinoma                    | pTis                                           |
| SC-22    | 9 y 5 m          | Male (castrated) | Toy Poodle                 | Large intestine (Rectum)           | Papillary adenocarcinoma                 | pTis                                           |
| SC-23    | 10 y 3 m         | Male (castrated) | Mixed-breed                | Large intestine (Rectum)           | Papillary adenocarcinoma                 | pTis                                           |
| SC-24    | 8 y 8 m          | Female           | Toy Poodle                 | Large intestine (Cecum)            | Papillary adenocarcinoma                 | pT3                                            |
| SC-25-1  | 9 y 5 m          | Male (castrated) | Welsh Corgi                | Large intestine (Colon)            | Papillary adenocarcinoma                 | pTis                                           |
| SC-25-2  |                  |                  |                            | Large intestine (Colon)            | Papillary adenocarcinoma                 | pT2                                            |
| SC-26-1  | 9 y 5 m          | Male             | Shiba Inu                  | Large intestine (Rectum)           | Papillary adenocarcinoma                 | pTis                                           |
| SC-26-2  |                  |                  |                            | Large intestine (Rectum)           | Papillary adenocarcinoma                 | pTis                                           |
| SC-26-3  |                  |                  |                            | Large intestine (Rectum)           | Acinar adenocarcinoma                    | pTis                                           |
| SC-27    | 3 y 0 m          | Male (castrated) | Shetland Sheepdog          | Large intestine (Rectum)           | Papillary adenocarcinoma                 | pTis                                           |
| SC-28    | 6 y 9 m          | Male             | Mixed-breed                | Large intestine (Rectum)           | Papillary adenocarcinoma                 | pTis                                           |
| SC-29    | 1 y 0 m          | Female (spayed)  | Labrador Retriever         | Large intestine (Rectum)           | Papillary adenocarcinoma                 | pTis                                           |
| SC-30    | 7 y 8 m          | Male (castrated) | Toy Poodle                 | Large intestine (Rectum)           | Papillary adenocarcinoma                 | pTis                                           |
| SC-31    | 8 y 0 m          | Male (castrated) | Yorkshire Terrier          | Large intestine (Rectum)           | Papillary adenocarcinoma                 | pTis                                           |
| SC-32    | 10 y 1 m         | Male (castrated) | Yorkshire Terrier          | Large intestine (Rectum)           | Papillary adenocarcinoma                 | pTis                                           |
| SC-33    | 4 y 11 m         | Male (castrated) | Shetland Sheepdog          | Large intestine (Rectum)           | Papillary adenocarcinoma                 | pTis                                           |
| SC-34    | 10 y             | Female (spayed)  | Shiba Inu                  | Large intestine (Rectum)           | Papillary adenocarcinoma                 | pTis                                           |
| SC-35    | 3 y              | Male             | Pomeranian                 | Large intestine (Rectum)           | Papillary adenocarcinoma                 | pTis                                           |
| SC-36    | 9 y              | Male (castrated) | Chihuahua                  | Large intestine (Rectum)           | Acinar adenocarcinoma                    | pT1                                            |
| SC-37    | 8 y 4 m          | Male (castrated) | Standard Poodle            | Large intestine (Rectum)           | Undifferentiated carcinoma               | pT3                                            |
| SC-38    | 9 y 5 m          | Male             | Labrador Retriever         | Large intestine (Rectum)           | Papillary adenocarcinoma                 | pTis                                           |
| SC-39    | 13 y 10 m        | Male (castrated) | Toy Poodle                 | Large intestine (Rectum)           | Papillary adenocarcinoma                 | pTis                                           |
| SC-40    | 9 y 10 m         | Female (spayed)  | Mixed-breed                | Large intestine (Rectum)           | Papillary adenocarcinoma                 | pTis                                           |

y: years, m: months, M: Male, F: Female

<sup>1</sup> Histological Classification of Tumours of the Alimentary System of Domestic Animals (WHO International Classification of Tumors of Domestic Animal Series) (Ref. 2)

<sup>2</sup> TNM classification of malignant tumors (Ref. 13)

<sup>3</sup> AJCC cancer staging manual (Ref. 12)

\* T (tumor) status, the depth of invasion, are evaluated according to the criteria below.

Stomach

Tis: Intraepithelial tumor without invasion of the lamina propria (carcinoma in situ), T1a: Tumor invades lamina propria or muscularis mucosae, T1b: Tumor invades submucosa, T2 Tumor invades muscularis propria, T3: Tumor invades subserosa, T4a: Tumor perforates serosa (visceral peritoneum), T4b: Tumor invades adjacent structures.

Small intestine

Tis: Carcinoma in situ, T1a: Tumor invades lamina propria or muscularis mucosae, T1b: Tumor invades submucosa, T2: Tumor invades muscularis propria, T3: Tumor invades subserosa or nonperitonealized perimuscular tissue (mesentery or retroperitoneum) with extension 2 cm or less, T4: Tumor perforates visceral peritoneum or directly invades other organs or structure.

Large intestine

Tis: Intraepithelial or invasion of lamina propria (carcinoma in situ), T1: Tumor invades submucosa, T2: Tumor invades muscularis propria, T3: Tumor invades subserosa or into non-peritonealized pericolic or perirectal tissue, T4a: Tumor perforates visceral peritoneum, T4b: Tumor directly invades other organs or structure.

**Table S4.** Comparison of histopathological diagnosis between endoscopically and surgically resected samples of gastrointestinal lesions in Jack Russell Terriers with the germline *APC* variant

| Case No. | Tumor No.* | Age at diagnosis | Method of excision                  | Location of tumor        | Histopathological diagnosis | Histological type |
|----------|------------|------------------|-------------------------------------|--------------------------|-----------------------------|-------------------|
| JRT-12   | 02         | 7 y 8 m          | Endoscopic biopsy                   | Stomach (Antrum)         | No significant lesion       |                   |
|          |            | 7 y 9 m          | Surgically resection                |                          | Adenocarcinoma              | Papillary         |
| JRT-20   | 02         | 13 y 10 m        | Endoscopic biopsy                   | Stomach (Cardia)         | Adenoma                     | Papillary         |
|          |            | 13 y 10 m        | Surgically resection                |                          | Adenocarcinoma              | Tubular           |
|          | 03         | 13 y 10 m        | Endoscopic biopsy                   | Stomach (Antrum)         | Adenoma                     | Papillary         |
|          |            | 13 y 10 m        | Surgically resection                |                          | Adenoma                     | Tubulopapillary   |
| JRT-22   | 01         | 2 y 3 m          | Endoscopic biopsy                   | Stomach (Antrum)         | Adenoma                     | Tubular           |
|          |            | 2 y 4 m          | Surgically resection                |                          | Adenoma                     | Tubulopapillary   |
| JRT-26   | 02         | 6 y 6 m          | Endoscopic biopsy                   | Large intestine (Rectum) | Adenocarcinoma              | Papillary         |
|          |            | 6 y 8 m          | Surgically resection (pull-through) |                          | Adenocarcinoma              | Papillary         |
| JRT-33   | 01         | 7y 4m            | Endoscopic biopsy                   | Large intestine (Rectum) | Adenocarcinoma              | Papillary         |
|          |            | 7 y 5 m          | Surgically resection (pull-through) |                          | Adenocarcinoma              | Papillary         |

y: years, m: months

\* See Supplementary Table 1
